# Supplementary material for: Controlled synthesis of monodisperse gold nanorods with a small diameter of around 10 nm and largest plasmon wavelength of 1200 nm
Source: Royal Society of Chemistry journal article supplement (doi:10.1039/d3cp02203j), 2023-01-01
Supplement: d3cp02203j1.pdf [file d3cp02203j1.pdf]

*Electronic Supplementary Information for*

**Controllable synthesis of monodisperse gold nanorod with a  
small diameter of around 10 nm and a largest plasmon  
wavelength of 1200 nm**

Anhua Wei,<sup>#</sup> Jingfang OuYang,<sup>#</sup> Yuyang Guo, Suju Jiang, Feifei Chen,

Jun Huang, Qi Xiao, and Zihua Wu\*

Guangxi Key Laboratory of Natural Polymer Chemistry and Physics, College of  
Chemistry and Materials, Nanning Normal University, Nanning 530001, China

\* Corresponding Author: zihuawu@126.com

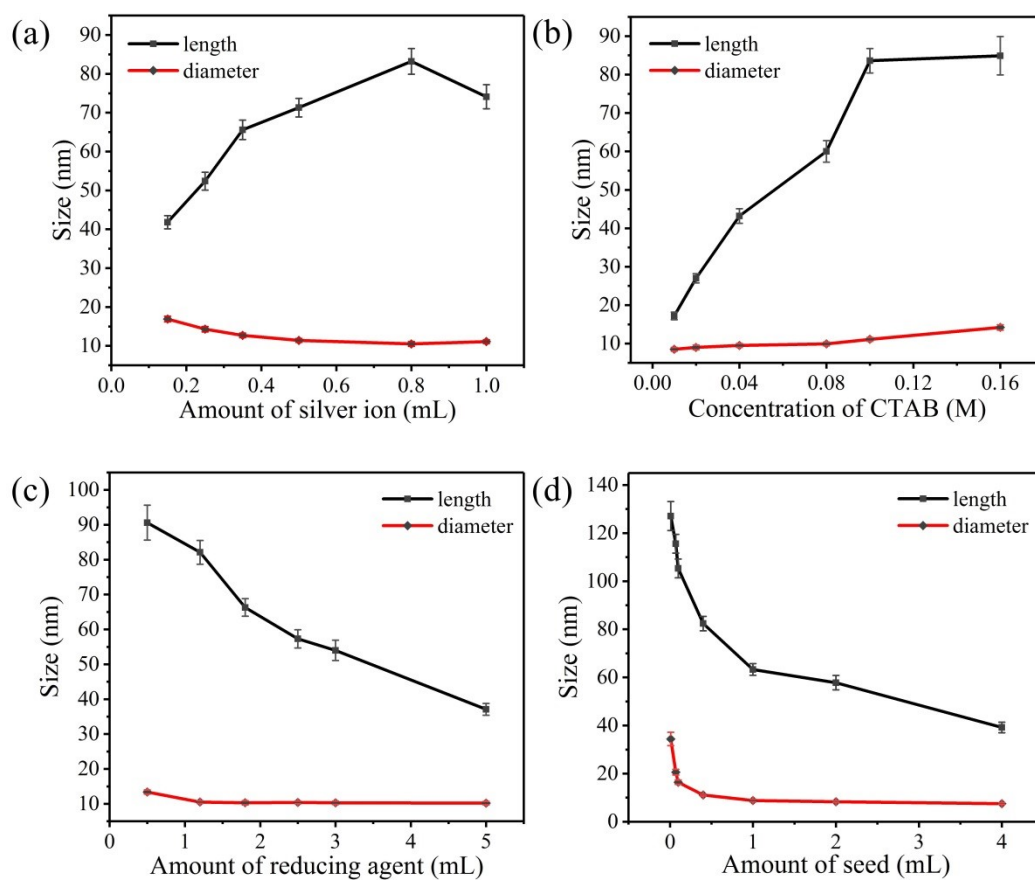

**Fig. S1** Variations of size of AuNR as a function of different amount of (a) silver ion, (b) CTAB, (c) reducing agent, and (d) gold seed.

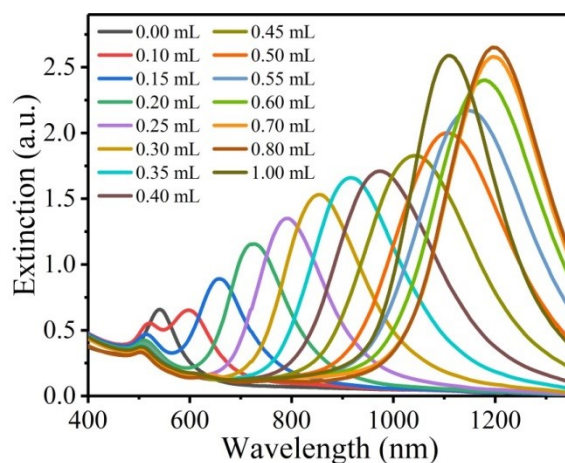

**Fig. S2** Extinction spectra of AuNR prepared by increasing silver ion from 0.0 mL to 1.0 mL.

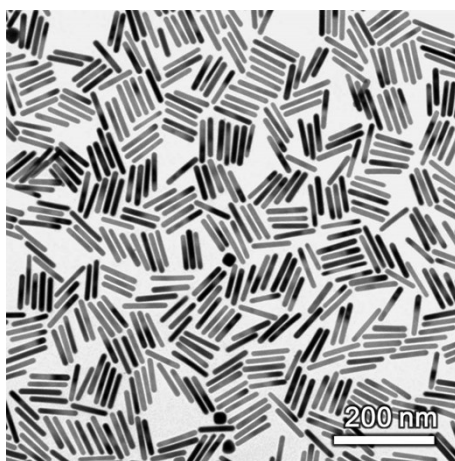

**Fig. S3** TEM image of AuNR prepared by 0.8 mL of silver ion.

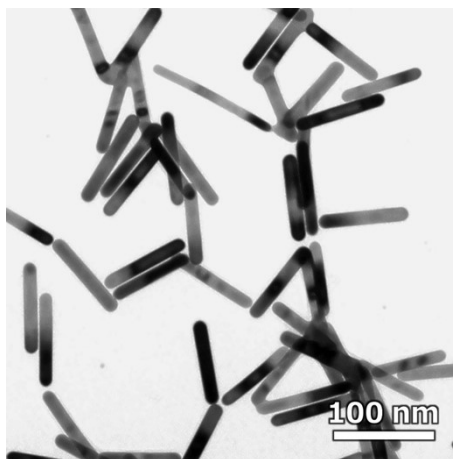

**Fig. S4** TEM image of AuNR prepared by 1.0 mL silver ion.

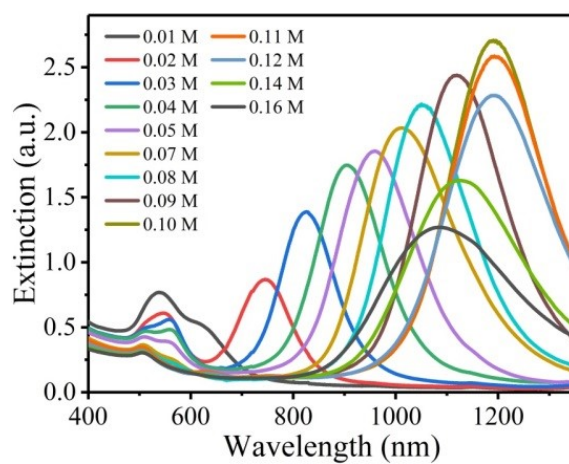

**Fig. S5** Extinction spectra of AuNR prepared by increasing CTAB from 0.01 M to 0.16 M.

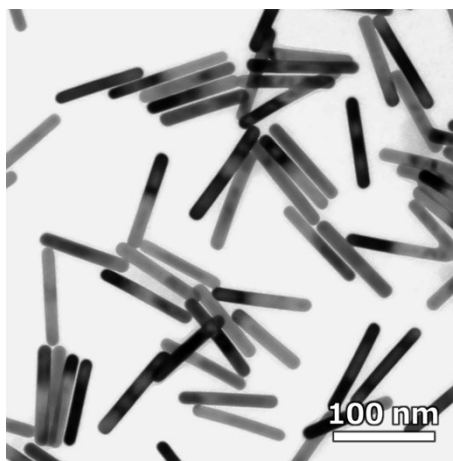

**Fig. S6** TEM image of AuNR prepared by 0.10 M CTAB.

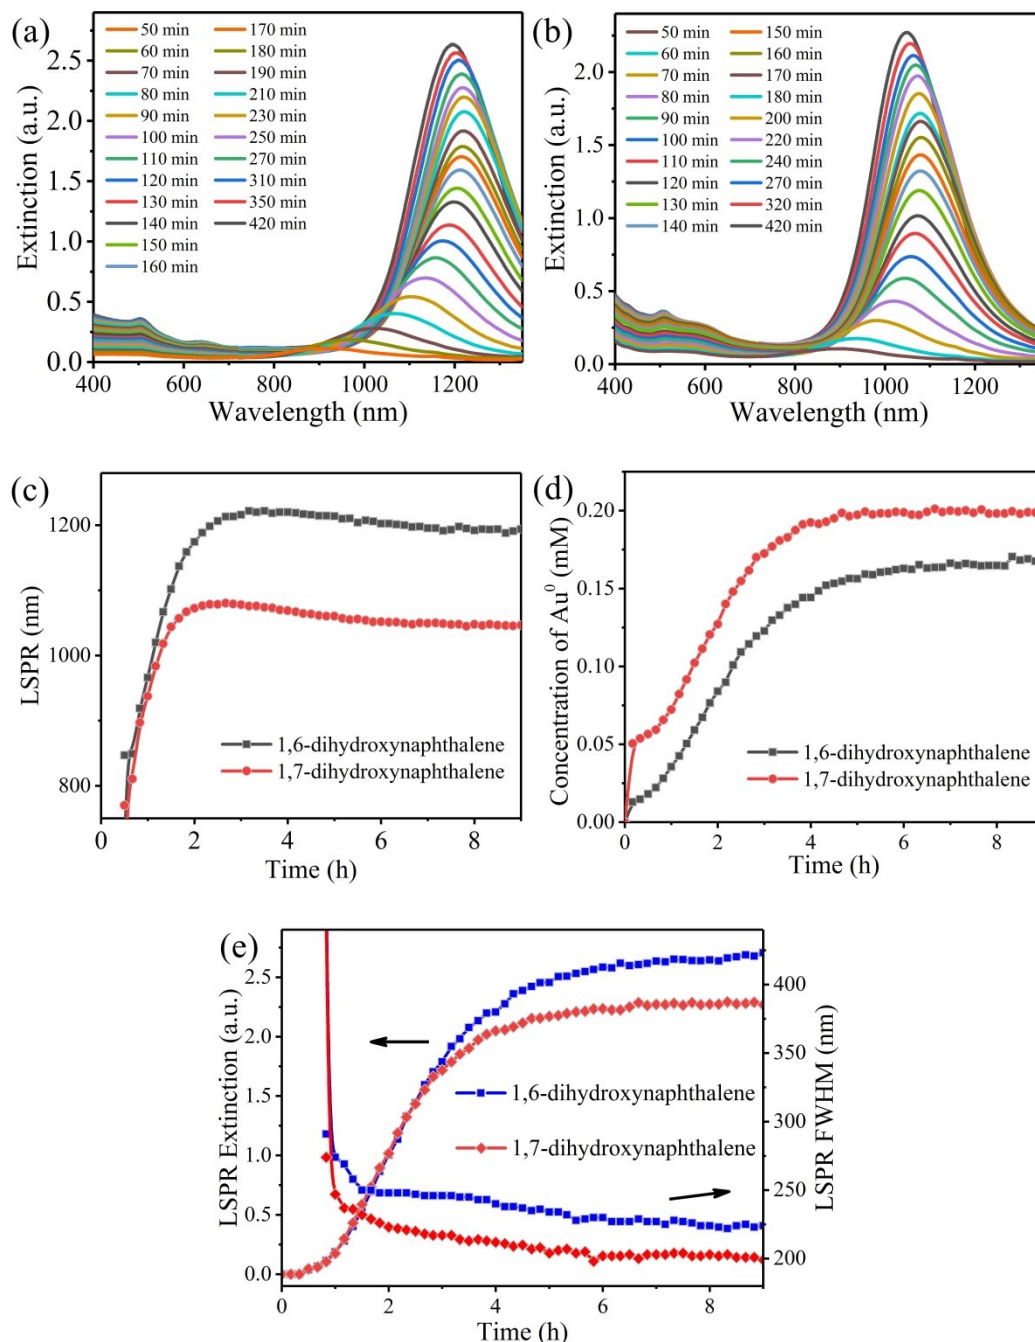

**Fig. S7** Kinetic UV-vis-NIR monitoring of AuNR synthesis by 1,6-dihydroxynaphthalene and 1,7-dihydroxynaphthalene. (a) Kinetic UV-vis-NIR spectra of AuNR synthesis by 1,6-dihydroxynaphthalene taken at 10 min intervals. (b) Kinetic UV-vis spectra of AuNR synthesis by 1,7-dihydroxynaphthalene taken at 10 min intervals. (c) LSPR wavelength of AuNR as a function of time. (d) Variation of concentration of Au<sup>0</sup> calculated from Abs<sub>400 nm</sub> as a function of growth time for two methods; (e) Measured extinction intensity and FWHM of the LSPR peak versus growth time for two methods.

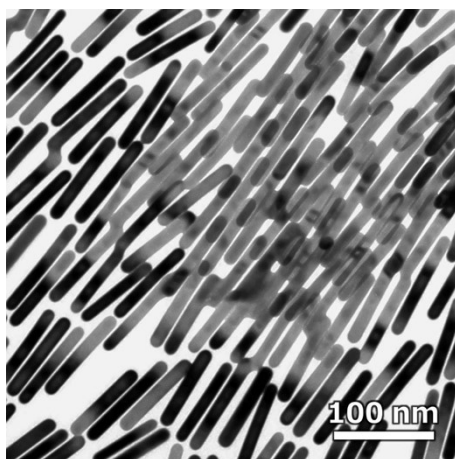

**Fig. S8** TEM image of AuNR prepared by 1.2 mL reducing agent.

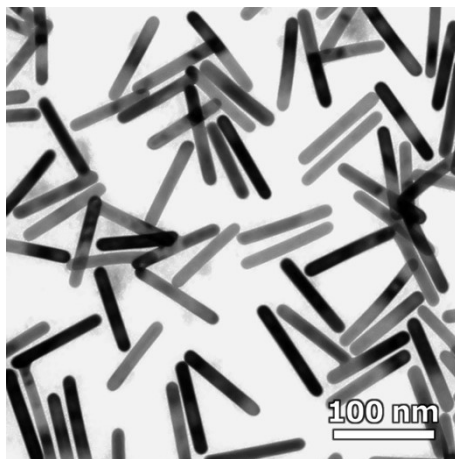

**Fig. S9** TEM image of AuNR prepared by 0.4 mL gold seed.

**Tab. S1** A summary of impacts of silver ion on LSPR wavelength, statistical results (length and diameter), and aspect ratio of AuNR. (Other conditions are: 0.1 M CTAB, 1.2 mL reducing agent, and 0.4 mL gold seed)

| AgNO <sub>3</sub><br>(mL) | LSPR<br>(nm) | Length<br>(nm) | Diameter<br>(nm) | Aspect<br>ratio | Figure<br>number |
|---------------------------|--------------|----------------|------------------|-----------------|------------------|
| 0.0                       | 541          | –              | –                | –               | 2a               |
| 0.1                       | 597          | –              | –                | –               | –                |
| 0.15                      | 657          | 41.8±1.7       | 16.9±0.7         | 2.5             | 2b               |
| 0.2                       | 725.5        | –              | –                | –               | –                |
| 0.25                      | 790          | 52.4±2.3       | 14.3±0.7         | 3.7             | 2c               |
| 0.3                       | 854          | –              | –                | –               | –                |
| 0.35                      | 915          | 65.6±2.5       | 12.7±0.6         | 4.9             | 2d               |
| 0.4                       | 973          | –              | –                | –               | –                |
| 0.45                      | 1043         | –              | –                | –               | –                |
| 0.5                       | 1105         | 71.3±2.4       | 11.4±0.5         | 6.3             | 2e               |
| 0.55                      | 1148.5       | –              | –                | –               | –                |
| 0.6                       | 1180         | –              | –                | –               | –                |
| 0.7                       | 1196.5       | –              | –                | –               | –                |
| 0.8                       | 1200         | 83.2±3.3       | 10.5±0.6         | 7.9             | 2f               |
| 1.0                       | 1107.5       | 74.1±3.1       | 11.1±0.5         | 6.7             | S4               |

**Tab. S2** A summary of impacts of CTAB on LSPR wavelength, statistical results (length and diameter), and aspect ratio of AuNR. (Other conditions are: 0.8 mL silver ion, 1.2 mL reducing agent, and 0.4 mL gold seed)

| CTAB (M) | LSPR (nm) | Length (nm) | Diameter (nm) | Aspect ratio | Figure number |
|----------|-----------|-------------|---------------|--------------|---------------|
| 0.01     | 537.5     | 17.2±1.0    | 8.5±0.5       | 2.0          | 3a            |
| 0.02     | 745.5     | 27.0±1.2    | 9.0±0.6       | 3.0          | 3b            |
| 0.03     | 826.5     | –           | –             | –            | –             |
| 0.04     | 905       | 43.2±1.9    | 9.5±0.5       | 4.6          | 3c            |
| 0.05     | 959.5     | –           | –             | –            | –             |
| 0.07     | 1010.5    | –           | –             | –            | –             |
| 0.08     | 1050.5    | 60.0±2.8    | 9.9±0.5       | 6.1          | 3d            |
| 0.09     | 1119.5    | –           | –             | –            | –             |
| 0.10     | 1201.5    | 83.6±3.2    | 11.1±0.5      | 7.5          | S6            |
| 0.11     | 1192.5    | –           | –             | –            | –             |
| 0.12     | 1190      | –           | –             | –            | –             |
| 0.14     | 1125.5    | –           | –             | –            | –             |
| 0.16     | 1085      | 84.9±5.0    | 14.2±0.7      | 6.0          | 3e            |

**Tab. S3** A summary of impacts of reducing agent on LSPR wavelength, statistical results (length and diameter), and aspect ratio of AuNR. (Other conditions are: 0.1 M CTAB, 0.8 mL silver ion, and 0.4 mL gold seed)

| Reducing agent (mL) | LSPR (nm) | Length (nm) | Diameter (nm) | Aspect ratio | Figure number |
|---------------------|-----------|-------------|---------------|--------------|---------------|
| 0.5                 | 1103      | 90.6±5.0    | 13.4±0.6      | 6.8          | 6a            |
| 0.8                 | 1168.5    | –           | –             | –            | –             |
| 1.0                 | 1195      | –           | –             | –            | –             |
| 1.2                 | 1191      | 82.1±3.4    | 10.5±0.4      | 7.8          | S8            |
| 1.4                 | 1169      | –           | –             | –            | –             |
| 1.6                 | 1132.5    | –           | –             | –            | –             |
| 1.8                 | 1095.5    | 66.3±2.5    | 10.3±0.6      | 6.5          | 6b            |
| 2.0                 | 1049.5    | –           | –             | –            | –             |
| 2.3                 | 1003.5    | –           | –             | –            | –             |
| 2.5                 | 987.5     | 57.3±2.6    | 10.4±0.4      | 5.5          | 6c            |
| 3.0                 | 935       | 54.0±2.9    | 10.3±0.5      | 5.3          | 6d            |
| 3.5                 | 891       | –           | –             | –            | –             |
| 4.0                 | 857.5     | –           | –             | –            | –             |
| 4.5                 | 828       | –           | –             | –            | –             |
| 5.0                 | 801.5     | 37.1±1.7    | 10.2±0.5      | 3.6          | 6e            |



**Tab. S4** A summary of impacts of gold seed on LSPR wavelength, statistical results (length and diameter), and aspect ratio of AuNR. (Other conditions are: 0.1 M CTAB, 0.8 mL silver ion, and 1.2 mL reducing agent)

| Seed (mL) | LSPR (nm) | Length (nm) | Diameter (nm) | Aspect ratio | Figure number |
|-----------|-----------|-------------|---------------|--------------|---------------|
| 0.01      | 929       | 127.1±6.0   | 34.4±2.8      | 3.7          | 8a            |
| 0.02      | 950       | –           | –             | –            | –             |
| 0.03      | 968       | –           | –             | –            | –             |
| 0.04      | 985.5     | –           | –             | –            | –             |
| 0.05      | 1012      | –           | –             | –            | –             |
| 0.07      | 1046.5    | 115.6±3.9   | 20.6±1.2      | 5.6          | 8b            |
| 0.09      | 1077      | –           | –             | –            | –             |
| 0.1       | 1087      | 105.3±3.9   | 16.4±0.9      | 6.4          | 8c            |
| 0.2       | 1161.5    | –           | –             | –            | –             |
| 0.3       | 1186.5    | –           | –             | –            | –             |
| 0.4       | 1191.5    | 82.4±3.0    | 11.1±0.4      | 7.4          | S9            |
| 0.5       | 1175.5    | –           | –             | –            | –             |
| 0.7       | 1155.5    | –           | –             | –            | –             |
| 0.9       | 1127      | –           | –             | –            | –             |
| 1.0       | 1112.5    | 63.3±2.4    | 8.8±0.6       | 7.2          | 8d            |
| 1.2       | 1090      | –           | –             | –            | –             |
| 1.4       | 1072      | –           | –             | –            | –             |
| 1.6       | 1051.5    | –           | –             | –            | –             |
| 2.0       | 1031.5    | 57.8±3.0    | 8.3±0.4       | 7.0          | 8e            |
| 2.5       | 1002      | –           | –             | –            | –             |
| 3.0       | 983       | –           | –             | –            | –             |
| 4.0       | 955.5     | 39.2±2.2    | 7.5±0.4       | 5.2          | 8f            |
